# Supplementary material
Source: publisher figshare collection journal article supplement (https://future-science-group.figshare.com/ndownloader/files/34921734)
Supplement: Supplementary file 1 [file 34921734]

## Sheet: CpG2,793
* IlmnID for 2,793 tissue-specific CpG markers
cg00002810
cg00012692
cg00013899
cg00014112
cg00014752
cg00015530
cg00026222
cg00027081
cg00029282
cg00045532
cg00046625
cg00072839
cg00073794
cg00092551
cg00102183
cg00103785
cg00127894
cg00148025
cg00153856
cg00155679
cg00166234
cg00171166
cg00216804
cg00226923
cg00243272
cg00244001
cg00260803
cg00277591
cg00283857
cg00286701
cg00293626
cg00306284
cg00306851
cg00313722
cg00338329
cg00340349
cg00350296
cg00359325
cg00390143
cg00405198
cg00417147
cg00429618
cg00458454
cg00472758
cg00483503
cg00487187
cg00491603
cg00500540
cg00501272
cg00502254
cg00512563
cg00547425
cg00549561
cg00550797
cg00551143
cg00554969
cg00569091
cg00574907
cg00601836
cg00602326
cg00610577
cg00619915
cg00622654
cg00641409
cg00666173
cg00666903
cg00675569
cg00682002
cg00686694
cg00691586
cg00711291
cg00740870
cg00757212
cg00771593
cg00772774
cg00779167
cg00800512
cg00812246
cg00819233
cg00828602
cg00831247
cg00860321
cg00864768
cg00873953
cg00902496
cg00904548
cg00906973
cg00939727
cg00946535
cg00950846
cg00953211
cg00958215
cg00958311
cg00962254
cg00982974
cg00986350
cg00988806
cg00990974
cg00993140
cg00995324
cg01002529
cg01012439
cg01027728
cg01037108
cg01037496
cg01049530
cg01055129
cg01057287
cg01086672
cg01098142
cg01099825
cg01121610
cg01123186
cg01145544
cg01149192
cg01153620
cg01180441
cg01187464
cg01189011
cg01226742
cg01233786
cg01234984
cg01237565
cg01256320
cg01274916
cg01275887
cg01288367
cg01290701
cg01295785
cg01310345
cg01312316
cg01312997
cg01318461
cg01321962
cg01339008
cg01345354
cg01384686
cg01392656
cg01411786
cg01413632
cg01425293
cg01427769
cg01433332
cg01446372
cg01447702
cg01453157
cg01467532
cg01473955
cg01492170
cg01501009
cg01523881
cg01526355
cg01541443
cg01561200
cg01566745
cg01577755
cg01578875
cg01579370
cg01585372
cg01599925
cg01602001
cg01620672
cg01626326
cg01635193
cg01636561
cg01659279
cg01661001
cg01687793
cg01689583
cg01690182
cg01699028
cg01704534
cg01719179
cg01723031
cg01727105
cg01731783
cg01738524
cg01749464
cg01790498
cg01792902
cg01803859
cg01817009
cg01828733
cg01835695
cg01865484
cg01893629
cg01925891
cg01928553
cg01941671
cg01944137
cg01944226
cg01951459
cg01954683
cg01955533
cg01961105
cg01963573
cg01971120
cg01980495
cg01981960
cg01983454
cg01990910
cg01992765
cg02010829
cg02016985
cg02025407
cg02025879
cg02029242
cg02039634
cg02043697
cg02043791
cg02076020
cg02079963
cg02087067
cg02087289
cg02112681
cg02138124
cg02147231
cg02148352
cg02162412
cg02162880
cg02167193
cg02172312
cg02180498
cg02180915
cg02201215
cg02203922
cg02211449
cg02216727
cg02218306
cg02225716
cg02225988
cg02239805
cg02246645
cg02255454
cg02258444
cg02263426
cg02292949
cg02296627
cg02313013
cg02317397
cg02330271
cg02338778
cg02341197
cg02342906
cg02345613
cg02351277
cg02359773
cg02362848
cg02364826
cg02371631
cg02377021
cg02379764
cg02383626
cg02390813
cg02391432
cg02391433
cg02395363
cg02395434
cg02399008
cg02419362
cg02430497
cg02433979
cg02454815
cg02459569
cg02472348
cg02473237
cg02473600
cg02474600
cg02474926
cg02486166
cg02501418
cg02529358
cg02541231
cg02546607
cg02547426
cg02566698
cg02569437
cg02579136
cg02580005
cg02580045
cg02581587
cg02583271
cg02591280
cg02591564
cg02599006
cg02600394
cg02637843
cg02660440
cg02665570
cg02688760
cg02699432
cg02705958
cg02710485
cg02713960
cg02725069
cg02726278
cg02734326
cg02734600
cg02735620
cg02742418
cg02745140
cg02749511
cg02756856
cg02758599
cg02770857
cg02771336
cg02772106
cg02774542
cg02786417
cg02828785
cg02831668
cg02848331
cg02861541
cg02864757
cg02878739
cg02884239
cg02893344
cg02897667
cg02916809
cg02921627
cg02922913
cg02929073
cg02939078
cg02942845
cg02953397
cg02959277
cg02970861
cg02980079
cg02988730
cg02997735
cg03003256
cg03003745
cg03014882
cg03023867
cg03024301
cg03038685
cg03061518
cg03090436
cg03128133
cg03135351
cg03145124
cg03157179
cg03157530
cg03161476
cg03161498
cg03162410
cg03166566
cg03171211
cg03173367
cg03173942
cg03197792
cg03212183
cg03216043
cg03217954
cg03218479
cg03243683
cg03245889
cg03250019
cg03263618
cg03288954
cg03300581
cg03302088
cg03321196
cg03322057
cg03335938
cg03337218
cg03345925
cg03346706
cg03350828
cg03361068
cg03365432
cg03367519
cg03377355
cg03381111
cg03385114
cg03389789
cg03398303
cg03403093
cg03404742
cg03411082
cg03420580
cg03422204
cg03422651
cg03430116
cg03454705
cg03458172
cg03474350
cg03520802
cg03528118
cg03556243
cg03571301
cg03584891
cg03598366
cg03600605
cg03607359
cg03612577
cg03615683
cg03623771
cg03642513
cg03644281
cg03653726
cg03654668
cg03673694
cg03690080
cg03699749
cg03716999
cg03720950
cg03729251
cg03741850
cg03747456
cg03754400
cg03760060
cg03768513
cg03774288
cg03781123
cg03803086
cg03803818
cg03804136
cg03806192
cg03817673
cg03860853
cg03871267
cg03876732
cg03894975
cg03900378
cg03903247
cg03923789
cg03927893
cg03928410
cg03932201
cg03944099
cg03944444
cg03955568
cg03955927
cg03966099
cg03969906
cg03978242
cg03989758
cg04004607
cg04005677
cg04009429
cg04021962
cg04035353
cg04036306
cg04042305
cg04051396
cg04061361
cg04064050
cg04073934
cg04075428
cg04089246
cg04104695
cg04117375
cg04124789
cg04128303
cg04130455
cg04136922
cg04141185
cg04146405
cg04147906
cg04152767
cg04162725
cg04166210
cg04176254
cg04184623
cg04194054
cg04195454
cg04196143
cg04218899
cg04221886
cg04229372
cg04246521
cg04259977
cg04263215
cg04273148
cg04275570
cg04290835
cg04300278
cg04307587
cg04310833
cg04311403
cg04314111
cg04314308
cg04336905
cg04346459
cg04349178
cg04359252
cg04362711
cg04381298
cg04385765
cg04387597
cg04406800
cg04418330
cg04425458
cg04434994
cg04438064
cg04450037
cg04453792
cg04457536
cg04457794
cg04461050
cg04477010
cg04480285
cg04488647
cg04496104
cg04497015
cg04499792
cg04530628
cg04531704
cg04567323
cg04600406
cg04618171
cg04623270
cg04640250
cg04652957
cg04658841
cg04668521
cg04671526
cg04673565
cg04683551
cg04688645
cg04689606
cg04691867
cg04693928
cg04703318
cg04705952
cg04706655
cg04711998
cg04715649
cg04716051
cg04718987
cg04720665
cg04722620
cg04725041
cg04730372
cg04737993
cg04739306
cg04747693
cg04749066
cg04751297
cg04760604
cg04761267
cg04768463
cg04784101
cg04786207
cg04789644
cg04792034
cg04807036
cg04810755
cg04812509
cg04819180
cg04819655
cg04846715
cg04852348
cg04858082
cg04860664
cg04871460
cg04876978
cg04877901
cg04877910
cg04879755
cg04884579
cg04886221
cg04893833
cg04900893
cg04903360
cg04908960
cg04929173
cg04933208
cg04935521
cg04940089
cg04951051
cg04951131
cg04963082
cg04968835
cg04984039
cg04984818
cg04998282
cg05008975
cg05009389
cg05024916
cg05028274
cg05062854
cg05073386
cg05079794
cg05091570
cg05092932
cg05097899
cg05113898
cg05123976
cg05134918
cg05139187
cg05141341
cg05145233
cg05146544
cg05152300
cg05159909
cg05160181
cg05170183
cg05170342
cg05172655
cg05184311
cg05200311
cg05229598
cg05237360
cg05242402
cg05249644
cg05251269
cg05258294
cg05282135
cg05295427
cg05295685
cg05297437
cg05299048
cg05308317
cg05311180
cg05322916
cg05323683
cg05327187
cg05339066
cg05343689
cg05347108
cg05350800
cg05373256
cg05381383
cg05382012
cg05390279
cg05395187
cg05412696
cg05425699
cg05426700
cg05438708
cg05446322
cg05454975
cg05474864
cg05480110
cg05485379
cg05495611
cg05495879
cg05508062
cg05510241
cg05544413
cg05545132
cg05548488
cg05552035
cg05568054
cg05569109
cg05573550
cg05590156
cg05597349
cg05598562
cg05603908
cg05610148
cg05611779
cg05624930
cg05628702
cg05630208
cg05632020
cg05634376
cg05637265
cg05642923
cg05647567
cg05656364
cg05656486
cg05673731
cg05697539
cg05718036
cg05721858
cg05726109
cg05740418
cg05752315
cg05755899
cg05760937
cg05777919
cg05780616
cg05782454
cg05784951
cg05800368
cg05824225
cg05837036
cg05860313
cg05878390
cg05878558
cg05890019
cg05892484
cg05898452
cg05905124
cg05912584
cg05917748
cg05922253
cg05927789
cg05956452
cg05960024
cg05965853
cg05978306
cg05994244
cg06014057
cg06022902
cg06023791
cg06032540
cg06043908
cg06053738
cg06054272
cg06061966
cg06064636
cg06077738
cg06085493
cg06089468
cg06094085
cg06095047
cg06105778
cg06116806
cg06118999
cg06142743
cg06144905
cg06152215
cg06157170
cg06164717
cg06176201
cg06184547
cg06188545
cg06206357
cg06206957
cg06217769
cg06219206
cg06224510
cg06224832
cg06260647
cg06261925
cg06291314
cg06295238
cg06312985
cg06327799
cg06332842
cg06360604
cg06361606
cg06379876
cg06380356
cg06396496
cg06396724
cg06400745
cg06415550
cg06418973
cg06433132
cg06441362
cg06456125
cg06469252
cg06482904
cg06484100
cg06486088
cg06496786
cg06499271
cg06510438
cg06513888
cg06538757
cg06549275
cg06554120
cg06555468
cg06579738
cg06600429
cg06605158
cg06610259
cg06615719
cg06624731
cg06625767
cg06627617
cg06633081
cg06633243
cg06635431
cg06638568
cg06641593
cg06654549
cg06661057
cg06662140
cg06671660
cg06688293
cg06695611
cg06754197
cg06778159
cg06792154
cg06817737
cg06825448
cg06827256
cg06848185
cg06855485
cg06856155
cg06872435
cg06873218
cg06876354
cg06880930
cg06882199
cg06884548
cg06891775
cg06891939
cg06894585
cg06915915
cg06922248
cg06937653
cg06943912
cg06981182
cg06989253
cg06997997
cg07005770
cg07017374
cg07019638
cg07025989
cg07034269
cg07035165
cg07061775
cg07075840
cg07076109
cg07089399
cg07092097
cg07092805
cg07099640
cg07106761
cg07122245
cg07124017
cg07136872
cg07139329
cg07144666
cg07145834
cg07154944
cg07155331
cg07155478
cg07179688
cg07186472
cg07189962
cg07200487
cg07209034
cg07211516
cg07214314
cg07224147
cg07229301
cg07232033
cg07240673
cg07244268
cg07250128
cg07251141
cg07259418
cg07262335
cg07266350
cg07266412
cg07273415
cg07284801
cg07291349
cg07301329
cg07313162
cg07324116
cg07330145
cg07330212
cg07336964
cg07338464
cg07344025
cg07359306
cg07360250
cg07368069
cg07405121
cg07420232
cg07420680
cg07423363
cg07438452
cg07446674
cg07452799
cg07460095
cg07467854
cg07478122
cg07479030
cg07487572
cg07491357
cg07492757
cg07511317
cg07522403
cg07538944
cg07557337
cg07563069
cg07591937
cg07594833
cg07629355
cg07648454
cg07664976
cg07664990
cg07679348
cg07689396
cg07704235
cg07705604
cg07708198
cg07715328
cg07719583
cg07721569
cg07724971
cg07729527
cg07730183
cg07748583
cg07775420
cg07783183
cg07786995
cg07800665
cg07802362
cg07805699
cg07812957
cg07814345
cg07815491
cg07838483
cg07839536
cg07841477
cg07850967
cg07862423
cg07864976
cg07876105
cg07879612
cg07879785
cg07884764
cg07899076
cg07899411
cg07906432
cg07908984
cg07926491
cg07928191
cg07929406
cg07948194
cg07960762
cg07990556
cg08026493
cg08034379
cg08040448
cg08043200
cg08057475
cg08067346
cg08084454
cg08093097
cg08093959
cg08095852
cg08124209
cg08140055
cg08145067
cg08177743
cg08193363
cg08200625
cg08200851
cg08203682
cg08209184
cg08217589
cg08219218
cg08223235
cg08239458
cg08250921
cg08264805
cg08296263
cg08309135
cg08341278
cg08342134
cg08361126
cg08372947
cg08381437
cg08381868
cg08415731
cg08441314
cg08453021
cg08473660
cg08494871
cg08514735
cg08520743
cg08528444
cg08540929
cg08542351
cg08552167
cg08558886
cg08562243
cg08569786
cg08589721
cg08591538
cg08592104
cg08596595
cg08603125
cg08609845
cg08611163
cg08612138
cg08620154
cg08637905
cg08649919
cg08652985
cg08653904
cg08676249
cg08689784
cg08711067
cg08728856
cg08735549
cg08742095
cg08758887
cg08781549
cg08788055
cg08796240
cg08806779
cg08811888
cg08817983
cg08842616
cg08846327
cg08848462
cg08850169
cg08852894
cg08860608
cg08867439
cg08873746
cg08873940
cg08874747
cg08896387
cg08897188
cg08907436
cg08911820
cg08922068
cg08929188
cg08933505
cg08939394
cg08940570
cg08963581
cg08976687
cg08976810
cg09036996
cg09042458
cg09068286
cg09075327
cg09100343
cg09113420
cg09115646
cg09123760
cg09126541
cg09155145
cg09159452
cg09161542
cg09161758
cg09169796
cg09180512
cg09182900
cg09184502
cg09192377
cg09198200
cg09221667
cg09227616
cg09234297
cg09247255
cg09286421
cg09297468
cg09318120
cg09326204
cg09326702
cg09363194
cg09368074
cg09420439
cg09428766
cg09443046
cg09451549
cg09455126
cg09470010
cg09470142
cg09473180
cg09499849
cg09500565
cg09506504
cg09512236
cg09514431
cg09516965
cg09527670
cg09542111
cg09556952
cg09567212
cg09596975
cg09604352
cg09605693
cg09634226
cg09636163
cg09645993
cg09646983
cg09660810
cg09678836
cg09690765
cg09699015
cg09701062
cg09701233
cg09719850
cg09736286
cg09747827
cg09754991
cg09757595
cg09775695
cg09792881
cg09802018
cg09804503
cg09804858
cg09806262
cg09807033
cg09809672
cg09811393
cg09835408
cg09838956
cg09859596
cg09867143
cg09868111
cg09874482
cg09881503
cg09900986
cg09905852
cg09907542
cg09923855
cg09927251
cg09980114
cg09989996
cg09996240
cg10010036
cg10014470
cg10018933
cg10019095
cg10025838
cg10029213
cg10046401
cg10050397
cg10053339
cg10062193
cg10065736
cg10069493
cg10080732
cg10095242
cg10098670
cg10099813
cg10101862
cg10131095
cg10132987
cg10138970
cg10141332
cg10141942
cg10149021
cg10149889
cg10151367
cg10153942
cg10161638
cg10191387
cg10201574
cg10204999
cg10206873
cg10222534
cg10226073
cg10227327
cg10234477
cg10249507
cg10252181
cg10278046
cg10325088
cg10334928
cg10335067
cg10343314
cg10347635
cg10351620
cg10357909
cg10362475
cg10364182
cg10369688
cg10385101
cg10397819
cg10414829
cg10419849
cg10421300
cg10426084
cg10434977
cg10454596
cg10461218
cg10493436
cg10496150
cg10508883
cg10525394
cg10528484
cg10530280
cg10562781
cg10567810
cg10574431
cg10583736
cg10603275
cg10614445
cg10615519
cg10617739
cg10650299
cg10692140
cg10692467
cg10697491
cg10708739
cg10709026
cg10720966
cg10766942
cg10770742
cg10778978
cg10782218
cg10784273
cg10787442
cg10802700
cg10803923
cg10805676
cg10824582
cg10828910
cg10830649
cg10843343
cg10848640
cg10857558
cg10863922
cg10876767
cg10881749
cg10906602
cg10947592
cg10969178
cg10977795
cg10981909
cg10982851
cg10991514
cg11005452
cg11013793
cg11026987
cg11053171
cg11055795
cg11063170
cg11064833
cg11099899
cg11103296
cg11104416
cg11113760
cg11115622
cg11116288
cg11119767
cg11146034
cg11148581
cg11151395
cg11152884
cg11155784
cg11157838
cg11165357
cg11191368
cg11204212
cg11240212
cg11241498
cg11254361
cg11264539
cg11287055
cg11303301
cg11309214
cg11317705
cg11321156
cg11336311
cg11338420
cg11356794
cg11407215
cg11409998
cg11410920
cg11419111
cg11421073
cg11421927
cg11422156
cg11422964
cg11426317
cg11431055
cg11432488
cg11447186
cg11468953
cg11493923
cg11498228
cg11503661
cg11521470
cg11542165
cg11549025
cg11550865
cg11562596
cg11566561
cg11591485
cg11591516
cg11593791
cg11594566
cg11625107
cg11625262
cg11642140
cg11645631
cg11650763
cg11661281
cg11669877
cg11681462
cg11683663
cg11690789
cg11690979
cg11692073
cg11693019
cg11720818
cg11764177
cg11767392
cg11777290
cg11794877
cg11797226
cg11804414
cg11805852
cg11821702
cg11830876
cg11834956
cg11835080
cg11835695
cg11839815
cg11840467
cg11850843
cg11857142
cg11861709
cg11872373
cg11875624
cg11884704
cg11929750
cg11932707
cg11946165
cg11948055
cg11953516
cg11953794
cg11963912
cg11984911
cg11986760
cg11991516
cg12033125
cg12033943
cg12038710
cg12039286
cg12049550
cg12075609
cg12097330
cg12103152
cg12107072
cg12124589
cg12128589
cg12130672
cg12139707
cg12155013
cg12161625
cg12176793
cg12177944
cg12188560
cg12194517
cg12194864
cg12202370
cg12218406
cg12232308
cg12232373
cg12235073
cg12235260
cg12259256
cg12277888
cg12305870
cg12306333
cg12314335
cg12332316
cg12332558
cg12334079
cg12347429
cg12349350
cg12361088
cg12373208
cg12373280
cg12392684
cg12404281
cg12411994
cg12435074
cg12459502
cg12477903
cg12502325
cg12509665
cg12547218
cg12561776
cg12586109
cg12590902
cg12593303
cg12615903
cg12632097
cg12658495
cg12659114
cg12673499
cg12682870
cg12697116
cg12708799
cg12710519
cg12711627
cg12713735
cg12715741
cg12728606
cg12737588
cg12746356
cg12761572
cg12764620
cg12769506
cg12775656
cg12775728
cg12780433
cg12853742
cg12860391
cg12865818
cg12869334
cg12870705
cg12883523
cg12892054
cg12895179
cg12903530
cg12911256
cg12935136
cg12937133
cg12942038
cg12952179
cg12953249
cg12967050
cg13017471
cg13046724
cg13067714
cg13075322
cg13087441
cg13091538
cg13095029
cg13105872
cg13116789
cg13153661
cg13169065
cg13197521
cg13200640
cg13204435
cg13214937
cg13220901
cg13221899
cg13223682
cg13245983
cg13257636
cg13260916
cg13268919
cg13278795
cg13285004
cg13285698
cg13313339
cg13366586
cg13374432
cg13384849
cg13388983
cg13391244
cg13393408
cg13397057
cg13411507
cg13426138
cg13454407
cg13457961
cg13480614
cg13494954
cg13496160
cg13496660
cg13500819
cg13506296
cg13525639
cg13527922
cg13544294
cg13548810
cg13554018
cg13558971
cg13567986
cg13575139
cg13578652
cg13589463
cg13599131
cg13603214
cg13603599
cg13634292
cg13635299
cg13645113
cg13651876
cg13661129
cg13663706
cg13679772
cg13680246
cg13696132
cg13703737
cg13705888
cg13715502
cg13725579
cg13751927
cg13791841
cg13806029
cg13808936
cg13821008
cg13836627
cg13847066
cg13855998
cg13856573
cg13868855
cg13874466
cg13877974
cg13879411
cg13891978
cg13906098
cg13906416
cg13908336
cg13912204
cg13946929
cg13962372
cg13974765
cg13975098
cg13979277
cg13982601
cg13983182
cg14001914
cg14002772
cg14010550
cg14012925
cg14024653
cg14029629
cg14038339
cg14041701
cg14055655
cg14062238
cg14083015
cg14094409
cg14095850
cg14098973
cg14100888
cg14101959
cg14114043
cg14114546
cg14148862
cg14155027
cg14155446
cg14155501
cg14163061
cg14164596
cg14165096
cg14172427
cg14177289
cg14178794
cg14182820
cg14189583
cg14215711
cg14221939
cg14228683
cg14230238
cg14247287
cg14263021
cg14265043
cg14266527
cg14275445
cg14302224
cg14313748
cg14318734
cg14338425
cg14348439
cg14377593
cg14377596
cg14378925
cg14381919
cg14382976
cg14409032
cg14418633
cg14443090
cg14460715
cg14467134
cg14474150
cg14498227
cg14505741
cg14506192
cg14507433
cg14508791
cg14520214
cg14521552
cg14531093
cg14533390
cg14557202
cg14571537
cg14575790
cg14606858
cg14619064
cg14630692
cg14634247
cg14636164
cg14650514
cg14660839
cg14670629
cg14672128
cg14675241
cg14696396
cg14697657
cg14703024
cg14706317
cg14719959
cg14737507
cg14748455
cg14753321
cg14764357
cg14780990
cg14783891
cg14809191
cg14822195
cg14824921
cg14833626
cg14853341
cg14872657
cg14898768
cg14906510
cg14947547
cg14947787
cg14950044
cg14950072
cg14952237
cg14976276
cg14994639
cg15015109
cg15029037
cg15038331
cg15048660
cg15051960
cg15070848
cg15087455
cg15127443
cg15136913
cg15144793
cg15154628
cg15156078
cg15161050
cg15164103
cg15179805
cg15187606
cg15194935
cg15210851
cg15227610
cg15228268
cg15244778
cg15246511
cg15275758
cg15299258
cg15299978
cg15307891
cg15315056
cg15355952
cg15356226
cg15390816
cg15391590
cg15423092
cg15436385
cg15453708
cg15459695
cg15464363
cg15468521
cg15474367
cg15527515
cg15533434
cg15537487
cg15543284
cg15557031
cg15629235
cg15649801
cg15656521
cg15673491
cg15682807
cg15685988
cg15686782
cg15688396
cg15689835
cg15693736
cg15698107
cg15707332
cg15707544
cg15719652
cg15723222
cg15745900
cg15751452
cg15765885
cg15768103
cg15770585
cg15782984
cg15788059
cg15803765
cg15817130
cg15830431
cg15840949
cg15872458
cg15874092
cg15906007
cg15907392
cg15935721
cg15935791
cg15937958
cg15967278
cg15975865
cg15984718
cg15998961
cg16023122
cg16069986
cg16081096
cg16099036
cg16111737
cg16116363
cg16139912
cg16143654
cg16145324
cg16170346
cg16174680
cg16175294
cg16182148
cg16182691
cg16184737
cg16201762
cg16218387
cg16218715
cg16227072
cg16231917
cg16233472
cg16240480
cg16265859
cg16267304
cg16270051
cg16273943
cg16294280
cg16303846
cg16311803
cg16312514
cg16314146
cg16315020
cg16326402
cg16329901
cg16356622
cg16366685
cg16373000
cg16378352
cg16400999
cg16409955
cg16423337
cg16426537
cg16430166
cg16431233
cg16435571
cg16439394
cg16442450
cg16454852
cg16456087
cg16472853
cg16482324
cg16498736
cg16508068
cg16509569
cg16512640
cg16535752
cg16537676
cg16546503
cg16549043
cg16553026
cg16567290
cg16586211
cg16590237
cg16612926
cg16617510
cg16631083
cg16636114
cg16642791
cg16645705
cg16666160
cg16678602
cg16689634
cg16695253
cg16700000
cg16702713
cg16734433
cg16737670
cg16739530
cg16778809
cg16779463
cg16781484
cg16796458
cg16812352
cg16818993
cg16831085
cg16838838
cg16851771
cg16858463
cg16860971
cg16861017
cg16874583
cg16878595
cg16903605
cg16927379
cg16941656
cg16953816
cg16964533
cg16971827
cg16974893
cg16983084
cg16990945
cg17010895
cg17012202
cg17022488
cg17032989
cg17061862
cg17079833
cg17136011
cg17145862
cg17147045
cg17152524
cg17153122
cg17167468
cg17172761
cg17174814
cg17198397
cg17199018
cg17200999
cg17202086
cg17205316
cg17219656
cg17229371
cg17230535
cg17232217
cg17242362
cg17253459
cg17267835
cg17274072
cg17275162
cg17283169
cg17292622
cg17315219
cg17319788
cg17330458
cg17355919
cg17361896
cg17374034
cg17374636
cg17378509
cg17386265
cg17403702
cg17416383
cg17418387
cg17418463
cg17420968
cg17428922
cg17431023
cg17438849
cg17446010
cg17455261
cg17472610
cg17475813
cg17493391
cg17501774
cg17557766
cg17582336
cg17620251
cg17629929
cg17633020
cg17635080
cg17643757
cg17643880
cg17647904
cg17670641
cg17689490
cg17697633
cg17702388
cg17706972
cg17707984
cg17747171
cg17747551
cg17747879
cg17750946
cg17767185
cg17769463
cg17792564
cg17792849
cg17824690
cg17825100
cg17825400
cg17831440
cg17843418
cg17865265
cg17877071
cg17885542
cg17894293
cg17919004
cg17924901
cg17942750
cg17978367
cg17991940
cg17996329
cg17998964
cg18021257
cg18034092
cg18042632
cg18044113
cg18057723
cg18058747
cg18094261
cg18097155
cg18098400
cg18109665
cg18111443
cg18113295
cg18131141
cg18136895
cg18156686
cg18156845
cg18159802
cg18190547
cg18195276
cg18196782
cg18202405
cg18208742
cg18235799
cg18255166
cg18263587
cg18264728
cg18270687
cg18274664
cg18278899
cg18282393
cg18298494
cg18309286
cg18322589
cg18323749
cg18326022
cg18328612
cg18334288
cg18334727
cg18348647
cg18359921
cg18360755
cg18365383
cg18367631
cg18378955
cg18398753
cg18423210
cg18433109
cg18442362
cg18443378
cg18456459
cg18459806
cg18477429
cg18495781
cg18534312
cg18536123
cg18538297
cg18539461
cg18552334
cg18554789
cg18558767
cg18570553
cg18595324
cg18597315
cg18623355
cg18668780
cg18677278
cg18683604
cg18685561
cg18686665
cg18697049
cg18702935
cg18717067
cg18766882
cg18780401
cg18783374
cg18801599
cg18815957
cg18827179
cg18827566
cg18832223
cg18883852
cg18892244
cg18910630
cg18920088
cg18941864
cg18943917
cg18957751
cg18994033
cg18994063
cg19006050
cg19014295
cg19014335
cg19036153
cg19037241
cg19062258
cg19075129
cg19078576
cg19088795
cg19119818
cg19122260
cg19130973
cg19140335
cg19146577
cg19150916
cg19155557
cg19162841
cg19187110
cg19214408
cg19223782
cg19234412
cg19235339
cg19238349
cg19248659
cg19251600
cg19273253
cg19287349
cg19307232
cg19331876
cg19336198
cg19355325
cg19358195
cg19368383
cg19392379
cg19397320
[truncated: 794 more rows]

## Sheet: CpG514
* IlmnID for 514 tissue-specific CpG markers
cg00013899
cg00027081
cg00029282
cg00045532
cg00046625
cg00072839
cg00092551
cg00153856
cg00260803
cg00283857
cg00293626
cg00306851
cg00458454
cg00483503
cg00500540
cg00550797
cg00552973
cg00574907
cg00602326
cg00682002
cg00718444
cg00958215
cg00988806
cg01002529
cg01055129
cg01086672
cg01098142
cg01099825
cg01149192
cg01226742
cg01233786
cg01237565
cg01275887
cg01290701
cg01312997
cg01321962
cg01425293
cg01467532
cg01585372
cg01635193
cg01663016
cg01828733
cg01925891
cg01955533
cg01961105
cg01980495
cg02025407
cg02043697
cg02076020
cg02180915
cg02201215
cg02255454
cg02258444
cg02263426
cg02345613
cg02364826
cg02473237
cg02474926
cg02580045
cg02591564
cg02647998
cg02660440
cg02699432
cg02705958
cg02706110
cg02734600
cg02828785
cg03014882
cg03038685
cg03135351
cg03161498
cg03212183
cg03216043
cg03217954
cg03243683
cg03322057
cg03335938
cg03367519
cg03385114
cg03422204
cg03430116
cg03584891
cg03642513
cg03768513
cg03871267
cg03955927
cg03966099
cg04042305
cg04075428
cg04089246
cg04194054
cg04246521
cg04310833
cg04346459
cg04480285
cg04499792
cg04531704
cg04623270
cg04693928
cg04711998
cg04739306
cg04749066
cg04768463
cg04807036
cg04812509
cg04819180
cg04819655
cg04876978
cg04879755
cg04884579
cg04900893
cg04933208
cg04951051
cg04968835
cg04984039
cg05028274
cg05091570
cg05097899
cg05139187
cg05217755
cg05237360
cg05242402
cg05251269
cg05308317
cg05323683
cg05339066
cg05343689
cg05350800
cg05381383
cg05382012
cg05412696
cg05454975
cg05495879
cg05611779
cg05634376
cg05777919
cg05892484
cg05905876
cg06010390
cg06032540
cg06043908
cg06059032
cg06061966
cg06105778
cg06118999
cg06206957
cg06295238
cg06400745
cg06486088
cg06510438
cg06528584
cg06627617
cg06662140
cg06754197
cg06848185
cg06880930
cg06922248
cg06943912
cg06981182
cg07005770
cg07034269
cg07057042
cg07075840
cg07076109
cg07089399
cg07122245
cg07136872
cg07154944
cg07155478
cg07186472
cg07189962
cg07200487
cg07214314
cg07232033
cg07250128
cg07251141
cg07259418
cg07266412
cg07291349
cg07313162
cg07360250
cg07405121
cg07460095
cg07689396
cg07705604
cg07783183
cg07841477
cg07850967
cg07864976
cg07879785
cg07928191
cg07929406
cg07948194
cg08043200
cg08219218
cg08250921
cg08372947
cg08441314
cg08453021
cg08611163
cg08620154
cg08676249
cg08781549
cg08842616
cg08873940
cg08940169
cg08963581
cg09073398
cg09123760
cg09155145
cg09159452
cg09182900
cg09221667
cg09363194
cg09556952
cg09719850
cg09736286
cg09754991
cg09792881
cg09809672
cg09834142
cg09881503
cg09905852
cg10069493
cg10131095
cg10153942
cg10278046
cg10335067
cg10692467
cg10697491
cg10709026
cg10782218
cg10787442
cg10802700
cg10803923
cg10805676
cg10991514
cg11005452
cg11064833
cg11119767
cg11204212
cg11254361
cg11321156
cg11338420
cg11521470
cg11549025
cg11566561
cg11625107
cg11683663
cg11690789
cg11797226
cg11804414
cg11821702
cg11834956
cg11835695
cg11840467
cg11861709
cg11984911
cg12033943
cg12049550
cg12124589
cg12218406
cg12232308
cg12259256
cg12373208
cg12477903
cg12561776
cg12673499
cg12903530
cg12937133
cg13075322
cg13116789
cg13197521
cg13214937
cg13220901
cg13221899
cg13384849
cg13494954
cg13496160
cg13558971
cg13567986
cg13603599
cg13663706
cg13705888
cg13847066
cg13856573
cg13982601
cg14002772
cg14010550
cg14055655
cg14100888
cg14165096
cg14178794
cg14228683
cg14265043
cg14443090
cg14498227
cg14520214
cg14575790
cg14606858
cg14719959
cg14809191
cg14822195
cg14824921
cg14906510
cg14947547
cg15136913
cg15161050
cg15194935
cg15315056
cg15355952
cg15423092
cg15459695
cg15468521
cg15474367
cg15537487
cg15689835
cg15707332
cg15745900
cg15751452
cg15770585
cg15830431
cg15862841
cg15998961
cg16099036
cg16145324
cg16182148
cg16184737
cg16201762
cg16218387
cg16240480
cg16482324
cg16535752
cg16612926
cg16645705
cg16831085
cg16838838
cg16851771
cg16858463
cg16874583
cg16941656
cg17147045
cg17242362
cg17283169
cg17292622
cg17315219
cg17355919
cg17374636
cg17386265
cg17635080
cg17747551
cg17750946
cg17942750
cg17998964
cg18131141
cg18156686
cg18240850
cg18264728
cg18348647
cg18398753
cg18534312
cg18595324
cg18677278
cg18683604
cg18717067
cg18801599
cg18910630
cg19014335
cg19062258
cg19075129
cg19150916
cg19162841
cg19223782
cg19235339
cg19368383
cg19397320
cg19573208
cg19575883
cg19609242
cg19641325
cg19641839
cg19658522
cg19733736
cg19789755
cg19916212
cg19930116
cg19942237
cg19974283
cg20095124
cg20106654
cg20212823
cg20278383
cg20385508
cg20398880
cg20424833
cg20516209
cg20691436
cg20718350
cg20727124
cg20801711
cg20806040
cg20851559
cg20889394
cg21050001
cg21210758
cg21260850
cg21299372
cg21311834
cg21450888
cg21574675
cg21606956
cg21615583
cg21805118
cg21811911
cg21889604
cg21898046
cg21926708
cg21981270
cg21992501
cg22015277
cg22044408
cg22055524
cg22205573
cg22219254
cg22239213
cg22306928
cg22339744
cg22493809
cg22558061
cg22571393
cg22712840
cg22731204
cg22939733
cg23001131
cg23034818
cg23068797
cg23108580
cg23209285
cg23280730
cg23337031
cg23345864
cg23346781
cg23440816
cg23443847
cg23587176
cg23661000
cg23684410
cg23936587
cg24002149
cg24043861
cg24049880
cg24159436
cg24189917
cg24211826
cg24396400
cg24401557
cg24402975
cg24419436
cg24477315
cg24516799
cg24571871
cg24630516
cg24687806
cg24724587
cg24744172
cg24787470
cg24831879
cg24881289
cg24884444
cg24894531
cg24941342
cg24978383
cg25034117
cg25043496
cg25070639
cg25135018
cg25142327
cg25159927
cg25210451
cg25214966
cg25225756
cg25288675
cg25322645
cg25366586
cg25428929
cg25495650
cg25611057
cg25650964
cg25667712
cg25835019
cg25868286
cg25871890
cg26122129
cg26569771
cg26579578
cg26627956
cg26673629
cg26692294
cg26812585
cg26861732
cg26884027
cg26918117
cg26919387
cg26996201
cg27000934
cg27007717
cg27090078
cg27116819
cg27127903
cg27383215
cg27436324
cg27467929
cg27471304
cg27496339

## Sheet: CpG262
* IlmnID for 262 tissue-specific CpG markers
cg00015530
cg00045532
cg00148025
cg00260803
cg00293626
cg00405198
cg00417147
cg00458454
cg00491603
cg00512563
cg00619915
cg00740870
cg00812246
cg00860321
cg00904548
cg00946535
cg00958215
cg00986350
cg00988806
cg01098142
cg01099825
cg01233786
cg01234984
cg01392656
cg01635193
cg01925891
cg01944137
cg01983454
cg02258444
cg02351277
cg02474926
cg02580045
cg02591564
cg02828785
cg02922913
cg03673694
cg03690080
cg03781123
cg03955568
cg04073934
cg04089246
cg04146405
cg04314111
cg04418330
cg04434994
cg04461050
cg04480285
cg04623270
cg04688645
cg04812509
cg04852348
cg04879755
cg04884579
cg04933208
cg05024916
cg05028274
cg05062854
cg05113898
cg05200311
cg05242402
cg05282135
cg05347108
cg05373256
cg05382012
cg05485379
cg05610148
cg05637265
cg05755899
cg05956452
cg06118999
cg06142743
cg06327799
cg06361606
cg06400745
cg06433132
cg06579738
cg06624731
cg06635431
cg06641593
cg06872435
cg06922248
cg07089399
cg07154944
cg07209034
cg07229301
cg07291349
cg07324116
cg07359306
cg07460095
cg07479030
cg07594833
cg07689396
cg07705604
cg07748583
cg07864976
cg07884764
cg07926491
cg07928191
cg07990556
cg08043200
cg08250921
cg08372947
cg08611163
cg09473180
cg09567212
cg09605693
cg09634226
cg09645993
cg10018933
cg10080732
cg10131095
cg10278046
cg10335067
cg10414829
cg10454596
cg10614445
cg10692467
cg10720966
cg10787442
cg10824582
cg10857558
cg11152884
cg11165357
cg11421927
cg11422964
cg11447186
cg11591485
cg11681462
cg11690789
cg11840467
cg11884704
cg12332316
cg12477903
cg12561776
cg12710519
cg12853742
cg12892054
cg13116789
cg13214937
cg13220901
cg13384849
cg13500819
cg13603599
cg13703737
cg13705888
cg13856573
cg13982601
cg13983182
cg14010550
cg14100888
cg14228683
cg14247287
cg14575790
cg14748455
cg15087455
cg15299258
cg15299978
cg15688396
cg16116363
cg16170346
cg16201762
cg16311803
cg16645705
cg17167468
cg17172761
cg17242362
cg17292622
cg17403702
cg17431023
cg17582336
cg17643757
cg17747551
cg17750946
cg17825400
cg18334288
cg18360755
cg18367631
cg18597315
cg18717067
cg18766882
cg18801599
cg18827566
cg18910630
cg19223782
cg19235339
cg19273253
cg19331876
cg19575883
cg19641325
cg19910128
cg20212823
cg20306821
cg20691436
cg20698942
cg20702205
cg20792833
cg20806040
cg21311834
cg21548950
cg21574675
cg21857843
cg21992501
cg22055524
cg22101249
cg22159015
cg22332339
cg22463097
cg22618720
cg22671903
cg22848982
cg22867729
cg23091549
cg23280730
cg23337031
cg23345864
cg23346781
cg23461741
cg23587176
cg23618217
cg23661000
cg23975646
cg24214903
cg24311373
cg24376286
cg24402975
cg24419436
cg24571871
cg24789424
cg24859375
cg24881289
cg24884444
cg24891660
cg24957609
cg24978383
cg25070639
cg25185881
cg25225756
cg25373438
cg25495650
cg25518968
cg25567048
cg25745600
cg25781210
cg25868286
cg25871890
cg26033586
cg26114595
cg26194092
cg26306994
cg26389465
cg26664457
cg26673629
cg26799416
cg26807301
cg26884027
cg26898754
cg26919387
cg27090078
cg27116819
cg27155939
cg27320213
cg27322071

## Sheet: CpG133
* IlmnID for 133 tissue-specific CpG markers
cg00045532
cg00260803
cg00293626
cg00417147
cg00458454
cg00619915
cg00740870
cg00812246
cg00860321
cg00958215
cg00986350
cg00988806
cg01098142
cg01099825
cg01392656
cg02351277
cg02474926
cg02828785
cg04073934
cg04089246
cg04314111
cg04434994
cg04623270
cg04852348
cg04884579
cg04933208
cg05024916
cg05028274
cg05282135
cg05347108
cg05382012
cg05610148
cg05637265
cg06142743
cg06327799
cg06361606
cg06400745
cg06433132
cg06579738
cg06635431
cg06641593
cg06872435
cg07324116
cg07460095
cg07479030
cg07689396
cg07705604
cg07748583
cg07864976
cg07928191
cg07990556
cg08372947
cg09634226
cg09645993
cg10080732
cg10454596
cg10720966
cg10787442
cg10857558
cg11422964
cg11447186
cg11591485
cg11681462
cg11690789
cg11884704
cg12892054
cg13116789
cg13214937
cg13220901
cg13384849
cg13603599
cg13703737
cg13982601
cg14010550
cg14247287
cg14575790
cg14748455
cg15299258
cg16116363
cg16170346
cg16201762
cg16311803
cg16645705
cg17167468
cg17242362
cg17292622
cg17403702
cg17582336
cg17750946
cg17825400
cg18367631
cg18717067
cg18801599
cg19223782
cg19235339
cg19273253
cg19331876
cg19575883
cg19910128
cg20212823
cg20792833
cg20806040
cg21574675
cg21857843
cg21992501
cg22055524
cg22101249
cg22463097
cg22867729
cg23280730
cg23337031
cg23346781
cg23461741
cg23587176
cg23661000
cg23975646
cg24311373
cg24419436
cg24571871
cg24884444
cg25225756
cg25373438
cg25495650
cg25518968
cg25567048
cg25745600
cg25868286
cg26194092
cg26673629
cg26807301
cg26898754
cg26919387
cg27090078
